# Supplementary material
Source: publisher site journal article supplement (https://www.dovepress.com/article/520224)
Supplement: Supplementary file 1 [file 520224%20Revised%20Supplementary%20File.docx]

# Appendix A: Full Search Strategies by Database

| Database | Search String Used |
| --- | --- |
| PubMed | ("Breast Neoplasms" OR "Breast Cancer") AND ("Artificial Intelligence" OR "Machine Learning" OR "Deep Learning") AND ("Surgery" OR "Surgical Decision-Making") AND ("2019/01/01"[Date - Publication]: "2024/09/30"[Date - Publication]) |
| Embase | ('breast cancer'/exp OR 'breast neoplasm') AND ('artificial intelligence'/exp OR 'machine learning' OR 'deep learning') AND ('surgery' OR 'surgical decision-making') AND [2019-2024]/py |
| Scopus | TITLE-ABS-KEY ("breast cancer" AND "artificial intelligence" AND "surgery" AND ("machine learning" OR "deep learning")) AND PUBYEAR > 2018 AND PUBYEAR < 2025 |
| Web of Science | TS=("breast cancer" AND "AI" AND ("surgery" OR "surgical decision-making") AND ("deep learning" OR "machine learning")) AND PY=(2019-2024) |
| IEEE Xplore | ("Breast cancer" AND "Artificial Intelligence" AND "surgery") AND (Publication Year: 2019 TO 2024) |
| Cochrane Library | ("breast cancer" in Title Abstract Keyword AND "artificial intelligence" OR "machine learning") - from 2019 to 2024 |
| Saudi Digital Library | ("breast cancer" AND "artificial intelligence" AND "surgical decision making") AND (2019-2024) |

Appendix B. Outline of some important research related to AI and its applications and limitations in breast cancer (BC) surgical decision-making.

| Author (s) (year) | Country | Study design | Number of centers involved | Funding | Year of enrollment | Participants' details such as age, sample size, etc | Methods | Key Findings / Interpretations | Limitations |
| --- | --- | --- | --- | --- | --- | --- | --- | --- | --- |
| 1. Preoperative | | | | | | | | | |
| Dembrower K et al. (2023) 17 | Sweden | Prospective | Single center | Yes | 2020 | Females aged 40 to 74 years  Sample size: 58 344 | Comparing double reading by two radiologists vs. Single reading by AI and one reading by one radiologist | BC diagnosis rate was 4% higher in the involved group than in the two radiologists’ interpretation.  According to their research, AI has the potential to be used under controlled conditions in the study environment and performance monitoring in real-world scenarios. | AI results may underestimate detection ability.  Retrospective data requires real-time adjustment.  Sensitivity and interval cancer rates are not calculable.  Limitations in generalizability |
| Taleghamar H et al. (2022) 26 | Canada | Retrospective diagnostic | Single center | Yes | Not specified | 181 female patients diagnosed with locally advanced breast cancer  Age is not specified | Quantitative ultrasound (QUS) imaging was performed pre-treatment to collect multi-parametric data.  A CNN was applied to analyze the quantitative ultrasound data to predict the response to neoadjuvant chemotherapy. Model evaluation was conducted using accuracy, sensitivity, and specificity metrics. | Accurate prediction of response to NAC  Supports personalized treatment strategies  Demonstrated workload reduction  Feasibility of integrating AI in clinical workflows | Model performance may vary in different clinical environments without additional calibration and testing.  QUS may not be available in all settings |
| Qiu Y et al. (2022) 35 | China | Retrospective | Single center | Yes | April 2016 and September 2018. | 285 female patients with positive SLNB | Developed MRI-based radiomics nomograms combining “radiomic features,” “MRI morphologic findings,” and “clinicopathologic characteristics.” | The MRI-clinical-radiomics nomogram achieved the highest predictive performance for non-SLN metastasis. | Single center study  Retrospective nature of data  Lack of external validation |
| Cè M et al. (2022) 30 | Italy | Narrative review | Not applicable (N/A) | Not specified | N/A | Not specified | They evaluated different AI models and their roles in BC risk classifications and treatment strategies. | The study concluded that using AI algorithms, more complicated tasks in breast imaging, such as risk classifications and tumor molecular characteristics.  However, these AI algorithms are limited by the need for large quantities of high-quality data. | There is a need for large datasets, a lack of reproducibility, validation issues, integration into workflows, and resource constraints for smaller institutions. |
| Zhu Z et al. (2024) 31 | Not specified | Retrospective experiment study | N/A | No external funding | Not specified | Not specified | The efficiency of different image processing methods was explored.  They used multiple datasets such as Breast Ultrasound Image (BUSI) and Database for Screening Mammography (DDSM) datasets. | Different datasets processing explored different accuracy in diagnosis in BC detection and precision.  Hence, according to the breast image quality, tailored dataset processing methods need to be applied so that a personalized treatment plan can be made due to a more accurate diagnosis. | Results varied across datasets; lacks clinical validation and generalizability. |
| Park EK et al. (2024) 32 | United States | Cohort study | Multicenter | Not specified | January 2010 to December 2021 | 6864 women (16,894 mammograms); inclusion criteria: female, ≥22 years, no history of BC | Developed an AI model using mammographic data; validated its performance using independent datasets. | AI model showed promise in predicting future BC risk, comparable to clinical statistical models (traditional). | Lack of clarity on implementing in real-world settings  High-risk stratification needs refinement to better identify worse prognosis cancers |
| Boissin C et al. (2024) 54 | Sweden | Retrospective study | Single center | Yes | June 2012 to May 2018 | 896 BC female patients (1169 slide images) | A deep CNN model was proposed to differentiate high and low-grade tumors.  This DL method was applied for risk classification preoperatively. | Their findings suggested that the AI model offers decision assistance to surgeons who have preoperative biopsies. Hence, early treatment can be planned to use this model.  However, their study findings were limited to a single-center study. | Retrospective design  Single-center study  Lack of external validation |
| Lin G et al. (2024) 37 | China | Retrospective study | Multicenter | Yes | ---- | 494 BC patients in two hospitals in China were enrolled. | ML radiomics-based model (Random Forest based) to predict non-SNL involvement in one or two positive SNL patients | The proposed model using dynamic contrast-enhanced MRI showed promising results in predicting non-SNL involvement.  Hence, the stratification and prediction of metastasis of non-SNL can be enhanced for personalized clinical decision-making. | ---- |
| 1. Intraoperative | | | | | | | | | |
| Zhang S et al. (2024) 66 | China | Prospective cohort | Single center | Yes | April 26 to June 20, 2018 | 224 (129 patients dynamic full-field optical coherence tomography (D-FFOCT) | Utilized D-FFOCT combined with deep learning (DL) to differentiate benign and malignant breast tissues intraoperatively. | The present study revealed high accuracy, sensitivity, and specificity levels of the proposed model. Furthermore, the proposed model utilized approximately 10 times less time than the traditional method. | Single center study  Lack of external validation  Limited sample size |
| Veluponnar D et al. (2023) 67 | Netherland | Prospective cohort | Single center | No external funding | Not Specified | 109 breast ultrasound (BUS) images from 86 patients. | Proposed an AI model for automated tumor segmentation in perioperative BUS images. | This model achieved a high sensitivity and specificity in identifying tumor margins during breast-conservative surgery. | Algorithm changes could further enhance the developed model, identifying the artifacts (such as hematomas), and further validation of real-time margin assessment is required. |
| Choi MS et al. (2023) 68 | Republic of Korea | Prospective preclinical dry-run study | Multi-institutional | Yes | Not specified | Two left-side BC cases | Two phases: Phase 1 assessed manual contouring variations; Phase 2 assessed changes in interobserver variation (IOV) with AI auto-contouring intervention | AI interventions lead to decreased IOV and improved consistency in diagnosis and planning for proper management. | Limited sample  Only left-side BC cases |
| Żydowicz WM et al (2024) 74 | N/A | Review | N/A | No external funding | N/A | Based on existing works of literature | Discussed the integration of 3D imaging, virtual reality (VR), augmented reality (AR), and metaverse technologies in BC surgery. | These technologies enhance visualization, precision, and decision-making in BC surgeries. | Cost, accessibility, and adequate training were the major challenges. |
| Pradipta AR et al. (2020) 69 | N/A | Review | N/A | Not specified | N/A | Based on existing works of literature | The authors reviewed various emerging AI technologies that addressed intraoperative tumor margin assessment. | These technologies, including optical imaging, spectroscopy, and molecular imaging techniques, improved tumor margin assessment intraoperatively. | The techniques are resource-dependent and not widely accessible, especially in resource-limited settings.  The heterogeneous nature of the BC limits the implications of these techniques. |
| 1. Postoperative | | | | | | | | | |
| Zhang H et al. (2022) 86 | N/A | Systematic review and meta-analysis | Multicenter | Yes | Literatures from the databases up to November 2020 | BC patients; sample sizes ranged across included studies | Reviewed 8 studies evaluating VR-based interventions for symptom management (e.g., anxiety, pain, fatigue) and rehabilitation (e.g., upper limb mobility). | VR interventions reduced anxiety and improved upper limb mobility.  No effect of fatigue | No standardized protocols were followed across the studies. |
| Zeng L et al. (2023) 87 | China | Retrospective cohort | Single center | Yes | May 2011 to December 2019 | 1841 postoperative BC patients (Both males and females)  The majority were ≥ 35 years of age | Developed machine learning (ML) models ((SVM, XGBoost, and LSTM) to predict recurrence risk using clinicopathological features. | All three AI models showed promising results in predicting recurrence risk (accuracy of 0.78 and above)  It can be potential for personalized care. | The study findings were based on manually labeled clinical text challenges with high-dimensional data.  Region-specific  The use of surrogate endpoints. |
| Zuo D et al. (2023) 94 | China | Retrospective cohort | Single center | Yes | January 2011 to December 2018 | 342 female BC patients with a mean age of 46.65 | Developed and compared 11 ML algorithms to predict BC recurrence.  The optimal model was selected based on performance metrics. | The AdaBoost algorithm model consistently forecasts the likelihood of BC recurrence. | The authors cautioned about the limitations, including sample size, lack of external validation, and the necessity of further clinical details for making valuable personalized care. |
| Mansour S et al. (2024) 95 | Egypt | Retrospective cohort | Single center | No external funding | Not specified | 577 female patients (mean age 43.89)Mammaogram (postoperative) | The potential of an AI model (Lunit INSIGHT MMG) in analyzing postoperative mammograms to predict BC recurrence was assessed. | The AI improved the diagnosing accuracy of mammograms among the patients who underwent surgery. | Retrospective study  Single center study  Variations in imaging (follow-up) may impact the prediction |
| Eissa MAG et al. (2024) 100 | Egypt | Cross-sectional analytical | Single center | No external funding |  | 66 female patients who underwent BCS;  Age is not specified | Comparison between traditional vs. AI mammography of the breast tissue changes in postoperative patients. | AI algorithm-applied mammography provided the highest level of sensitivity in assessing breast tumors in postoperative patients. | Small sample size  Lack of accountability of the AI algorithm with clinical characteristics  Lack of long-term follow-up data |
| Schnitzler T et al. (2024) 102 | Switzerland | Retrospective | Multicenter | No external funding | Not specified | Mammographic images from female patients post-BCS. | U-Net-based deep CNN (dCNN) to detect surgical clips in follow-up mammograms after BCS. | The AI – Model received high accuracy and agreement with the radiologist. | Lack of dataset diversity.  The agreement may not reflect the real-world scenario as the radiologist diagnosed without any information about the patients.  Clip variability and the possibility of misclassification. |
